# Supplementary material for: The direct use of phenyldimethylsilanes in silicon assisted palladium catalysed cross couplingElectronic supplementary information (ESI) available: further experimental details. See http://www.rsc.org/suppdata/cc/b2/b205765d/
Source: Royal Society of Chemistry journal article supplement (doi:10.1039/b205765d), 2002-08-13
Supplement: b205765d.doc [file b205765d.doc]

# Supplementary data

The Direct use of Phenyldimethylsilanes in Silicon Assisted Palladium Catalysed Cross Coupling

# James C. Anderson,* Stéphane Anguille and Rosalyn Bailey

*School of Chemistry, University of Nottingham, Nottingham, NG7 2RD, UK.*

*Fax: +44 (0) 115 951 3564; Tel: +44 (0) 115 951 4194; E-mail: j.anderson@nottingham.ac.uk*

Our general experimental details have been reported.[[1]](#endnote-2)

**Preparation of (*E*)-1,5-diphenylpent-1-ene (3) from 1.** To a solution of **1** (30.0 mg, 0.11 mmol) in THF (0.2 mL) was added *t*-BuOK (27.0 mg, 0.24 mmol), 18-C-6 (35.0 mg, 0.16 mmol), TBAF (58.0 mg, 0.22 mmol), Pd2(dba)3 (5.0 mg, 5.5 mol) and iodobezene (22.0 mg, 0.11 mmol) at rt. After 45 m the reaction was filtered through a plug of silica (1x2 cm) and washed with Et2O. The solvent was removed *in vacuo* and the crude oil purified by flash column chromatography (10x3 cm silica, 20% EtOAc/hexane) to give **3** (21 mg, 85%).IR (thin film) 3063, 3027, 2933, 2857, 1599, 1495 cm-1; 1H NMR (400 MHz, CDCl3)  1.84 (2H, quin. *J* = 7.5), 2.28 (2H, q, *J* =6.8), 2.70 (2H, t, *J* =8.5), 6.26 (1H, dt, *J* =6.9, 15.8), 6.42 (1H, d, *J* =15.8), 7.14-7.36 (10H, m); 13C NMR (67 MHz, CDCl3)  31.0, 32.5, 35.6, 125.7, 125.9, 126.1, 126.2, 126.9, 127.7, 128.2, 128.3, 128.4, 128.9, 130.2, 133.9, 137.8, 142.4; MS (FAB+) 222.1396 (100%, M+, C17H18 requires 222.1409).

1. Anderson, J.C.; Siddons, D.C.; Smith, S.C.; Swarbrick, M.E. *J. Org. Chem.* **1996**, *61*, 4820. [↑](#endnote-ref-2)
